# Supplementary material for: Holocene and Common Era sea level changes in the Makassar Strait, Indonesia
Source: Copernicus journal article supplement (doi:10.5194/cp-2019-63), 2019-06-20

Sea Level Indexpoints Barrang Lompo

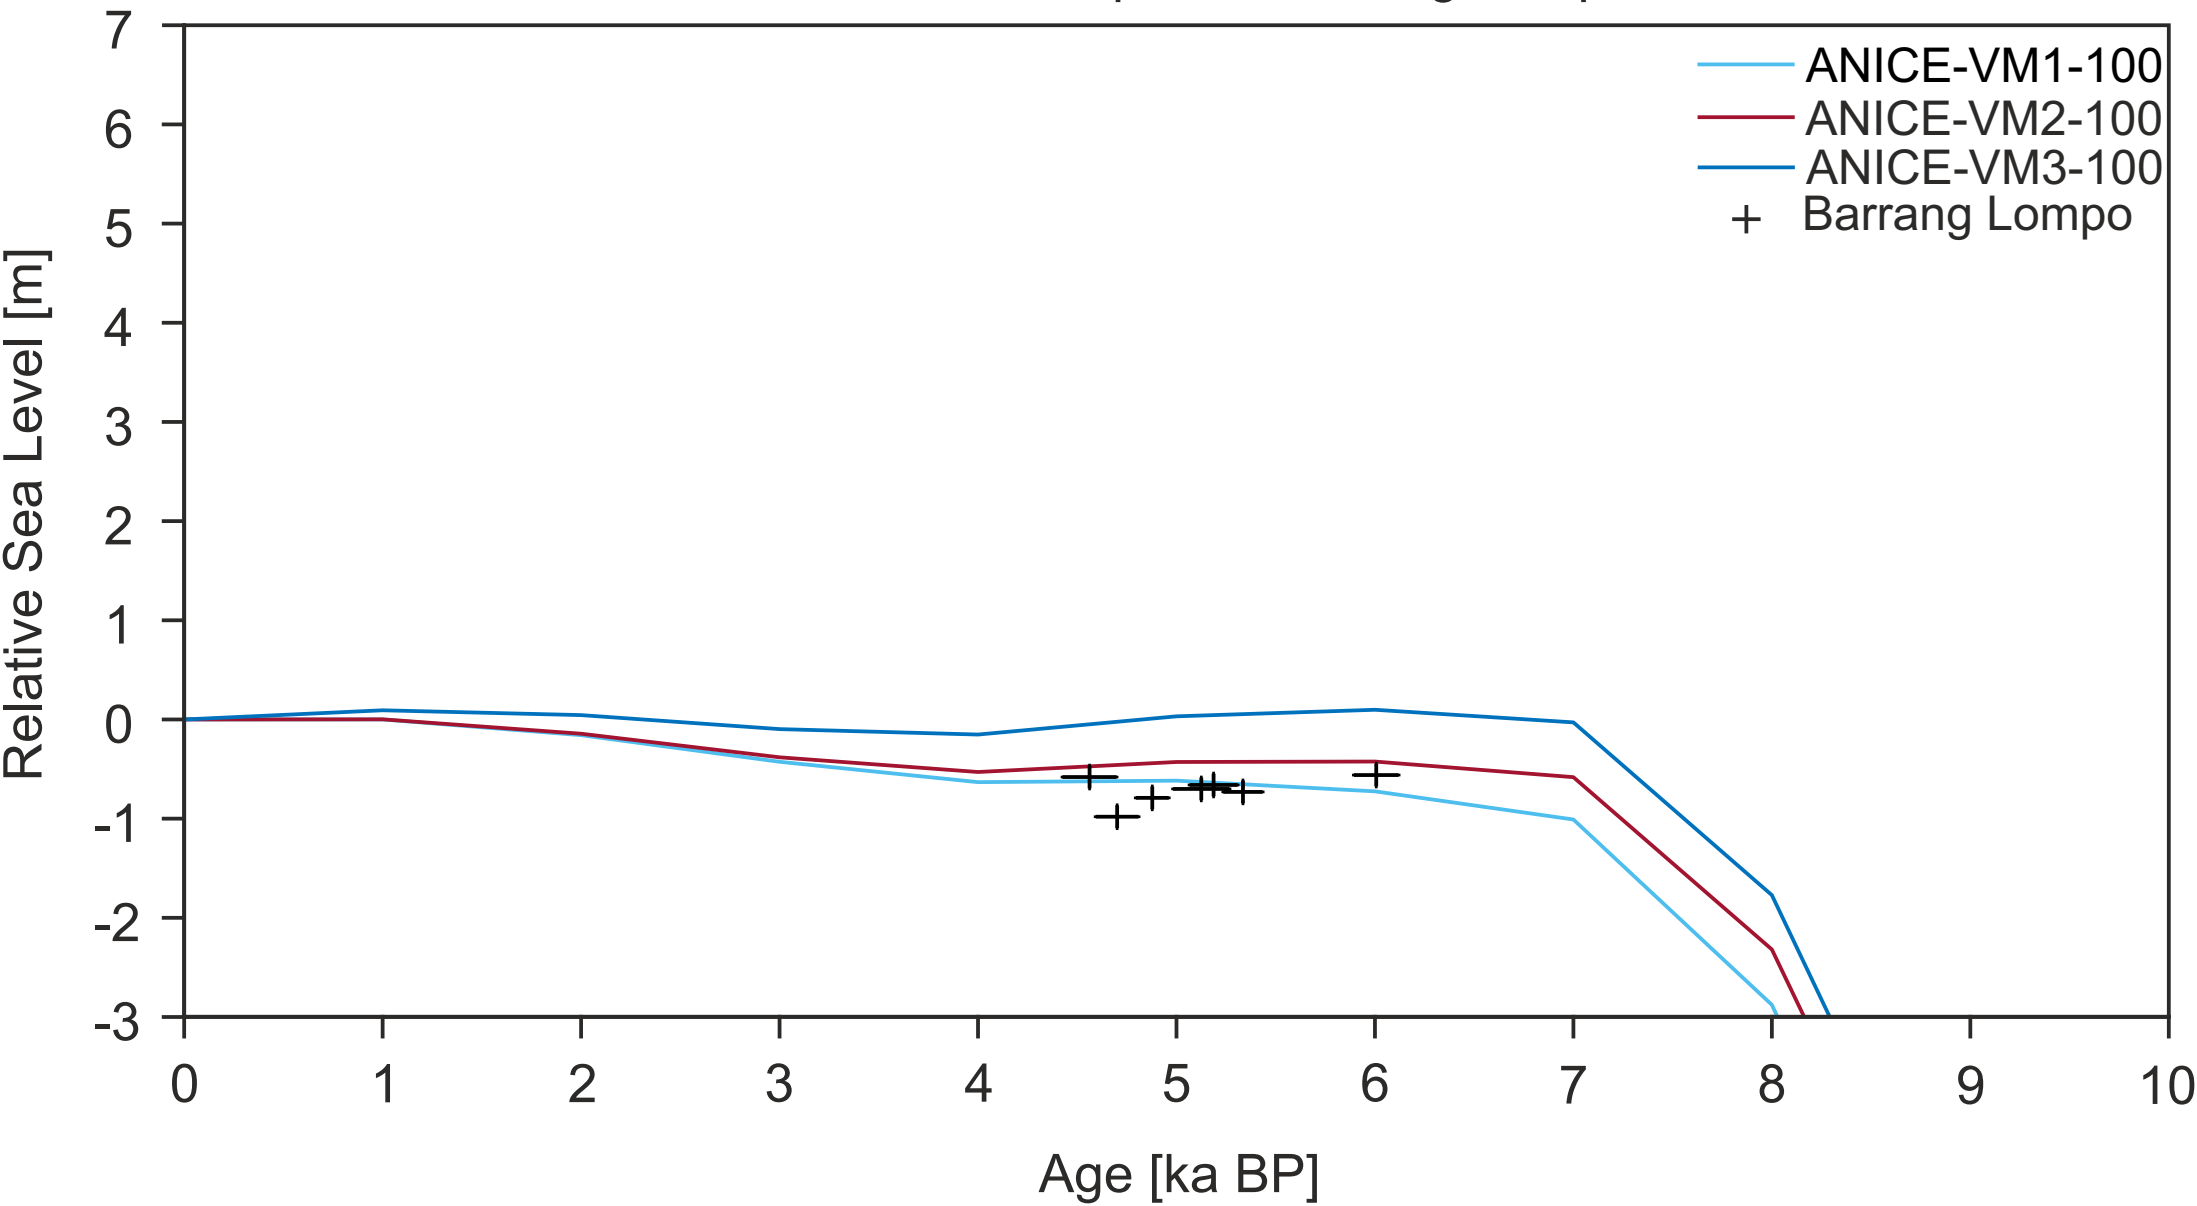

Sea Level Index points Bone Batang

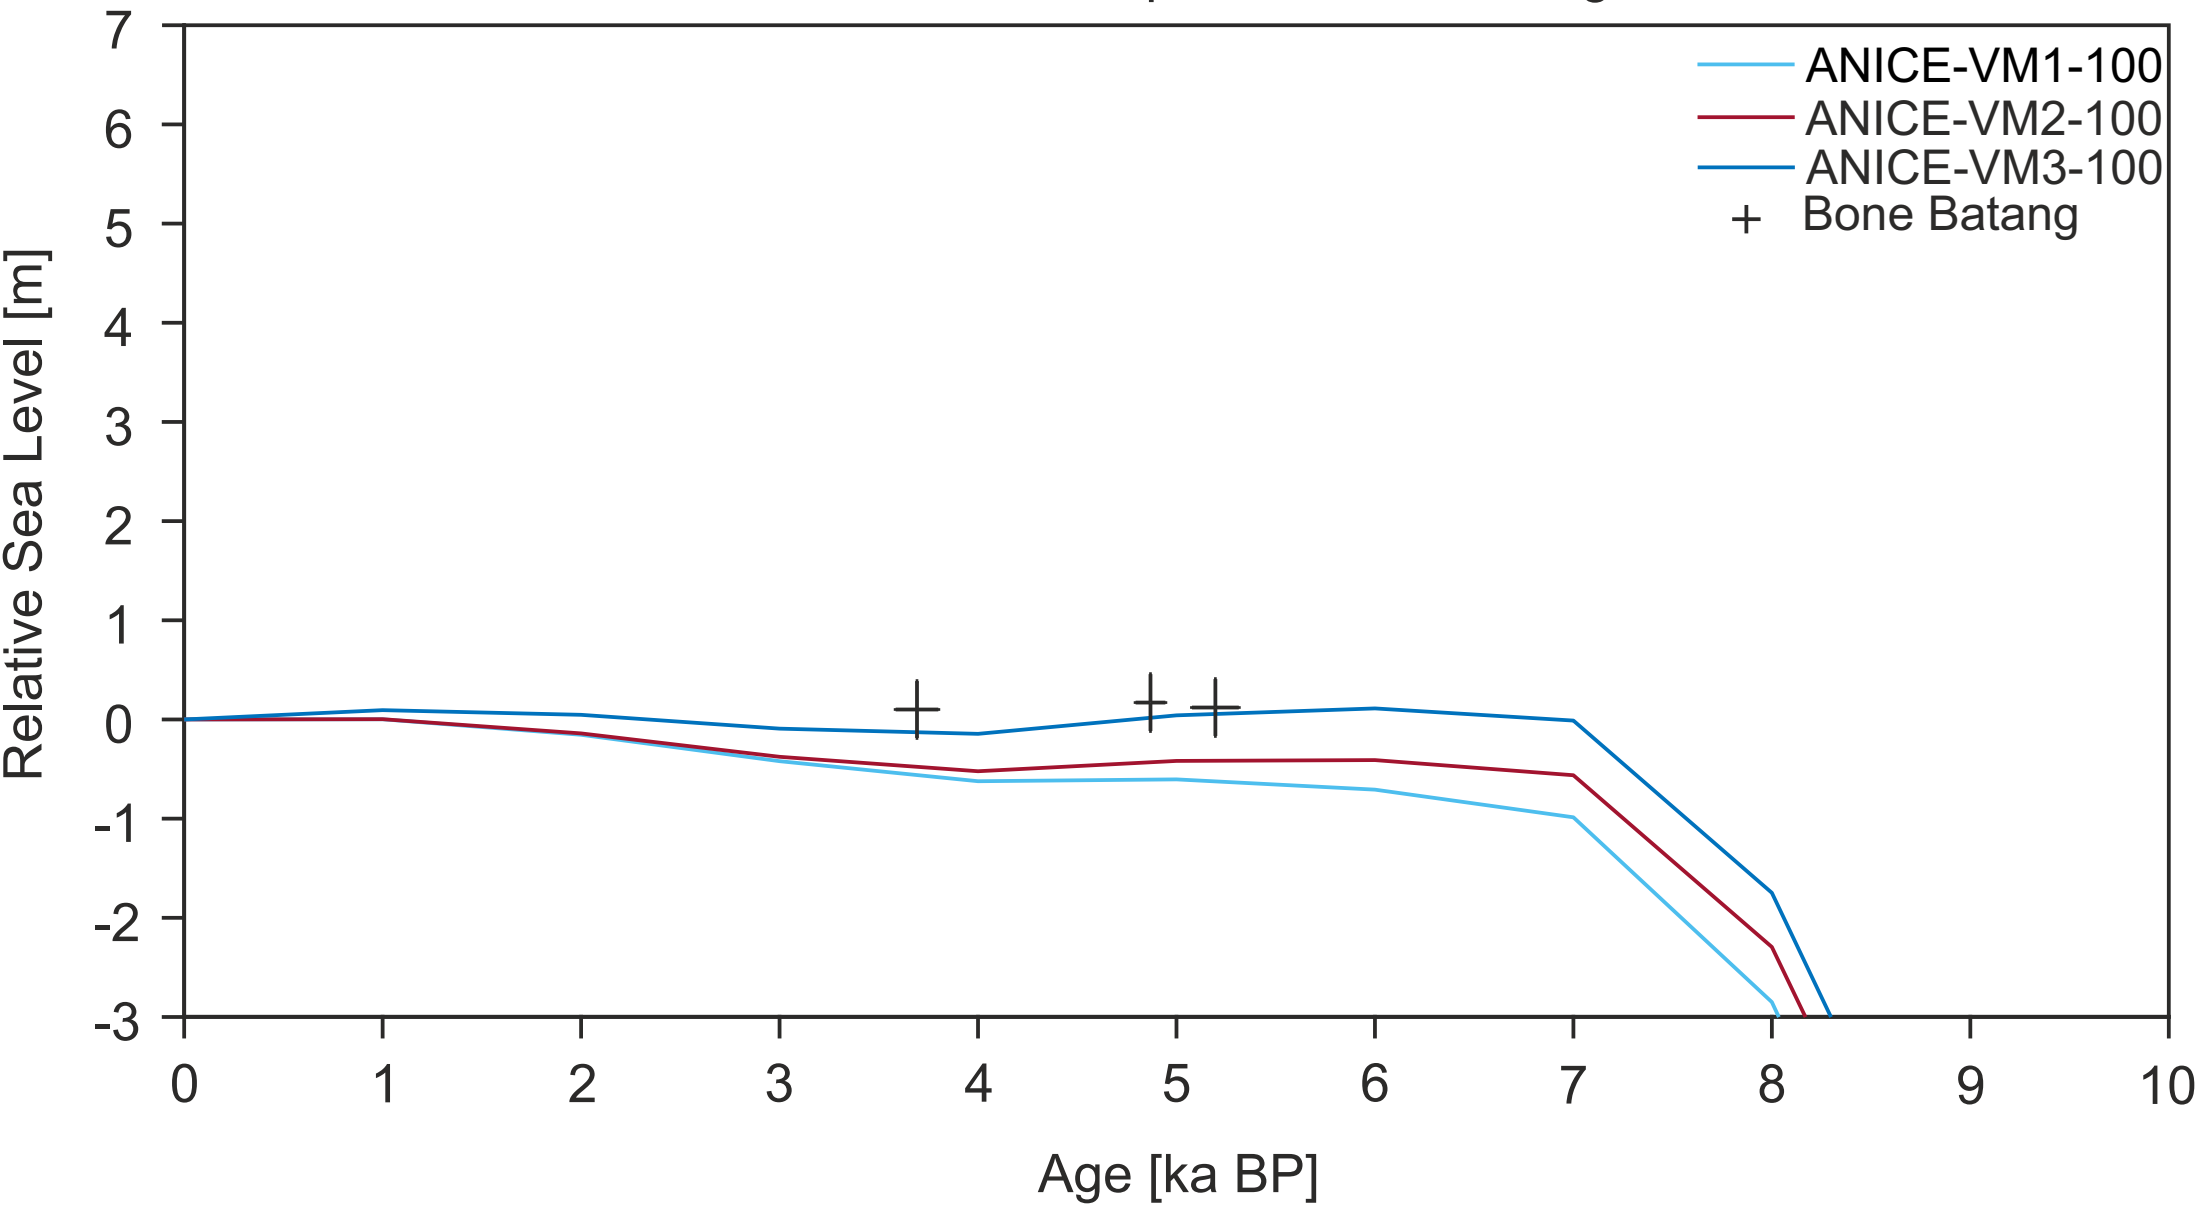

Sea Level Index points Kodingareng Keke

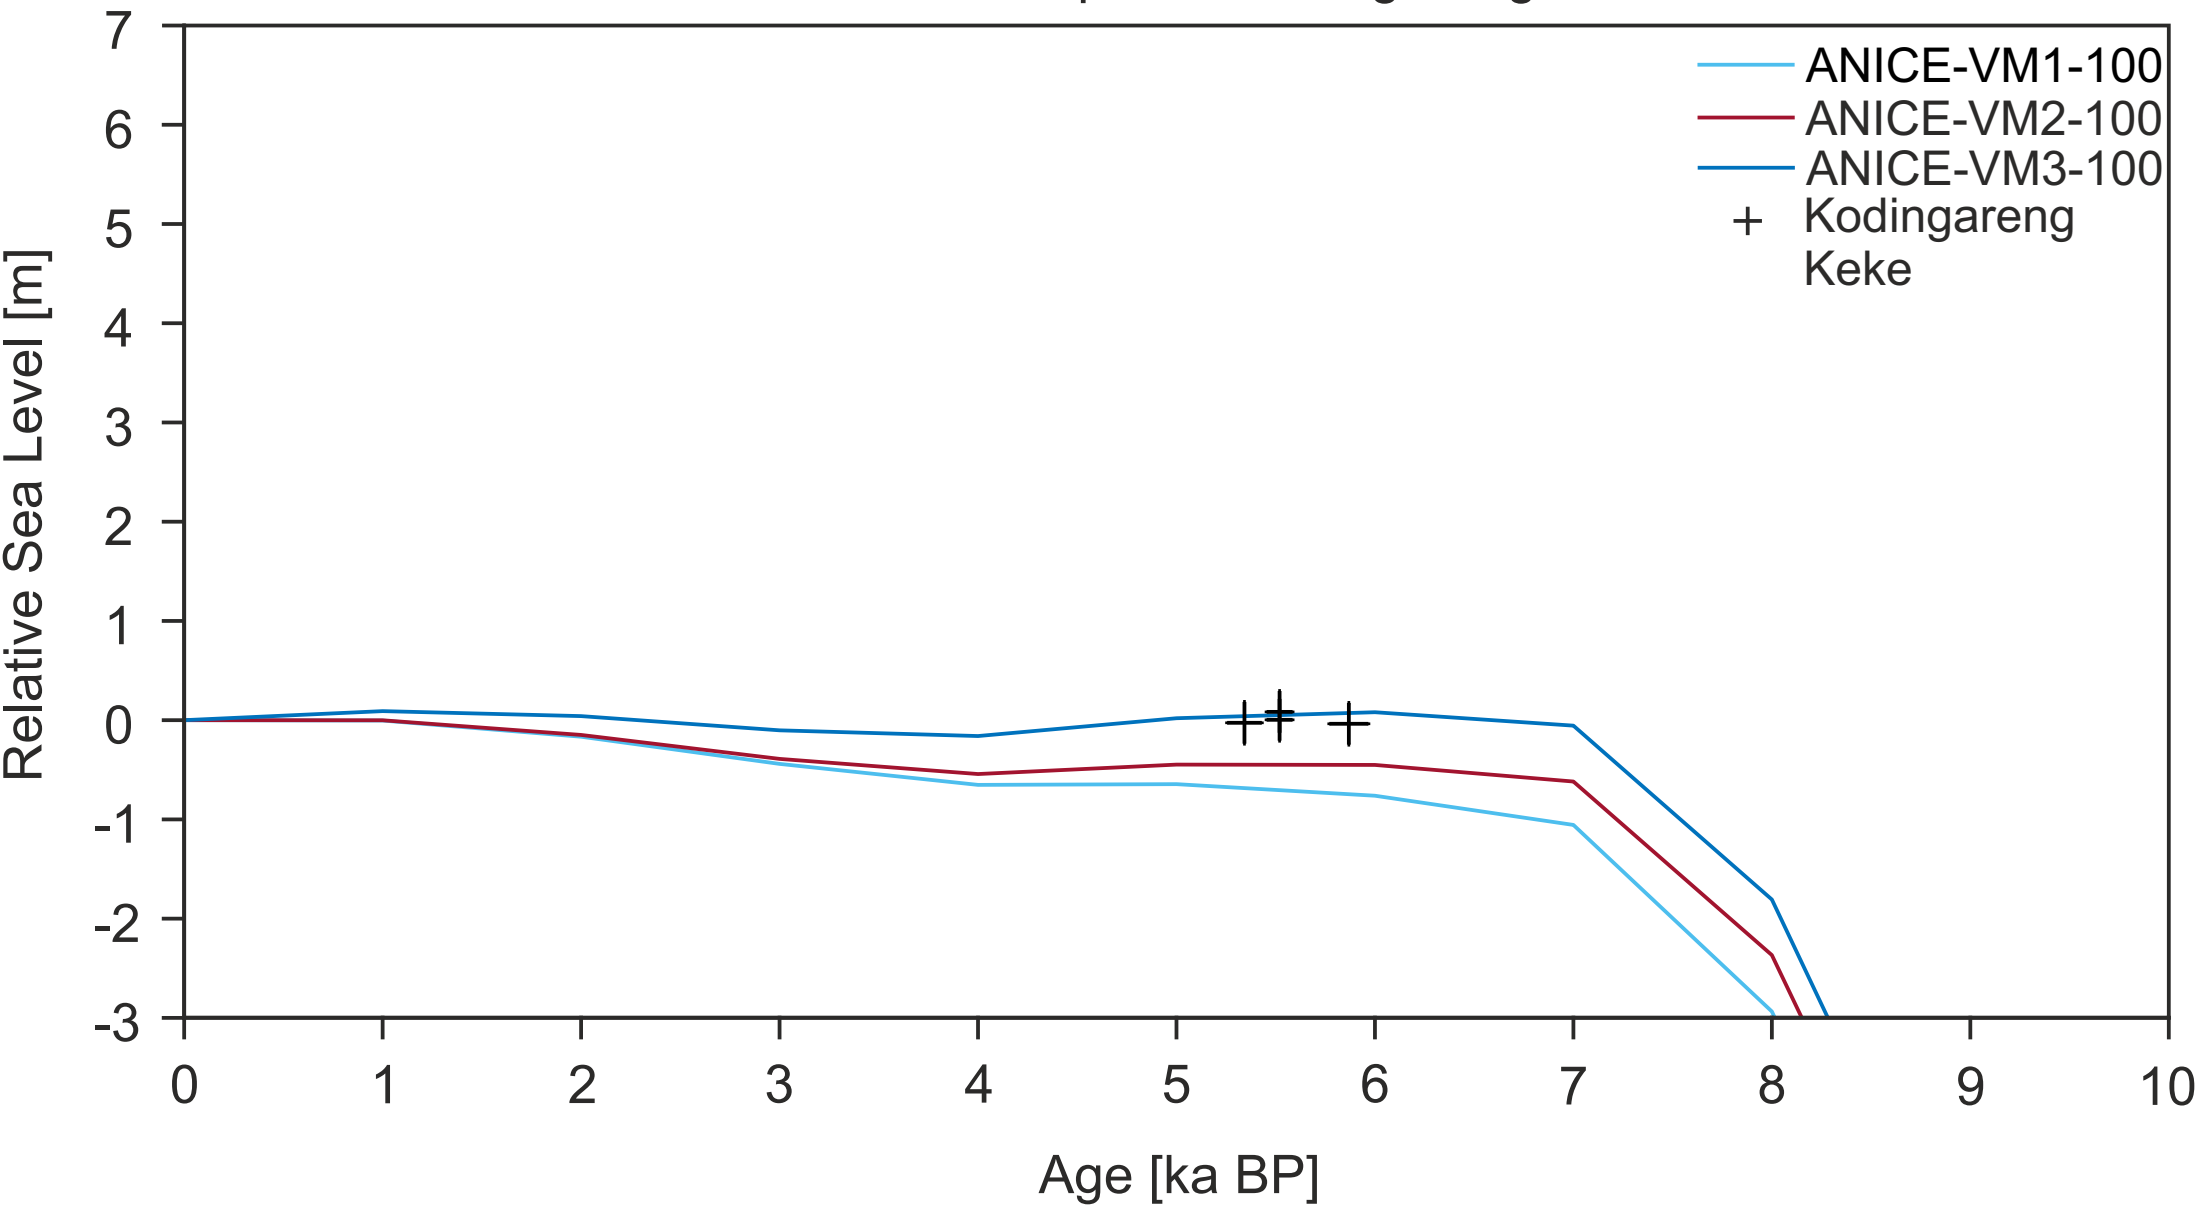

Sea Level Index points Panambungan

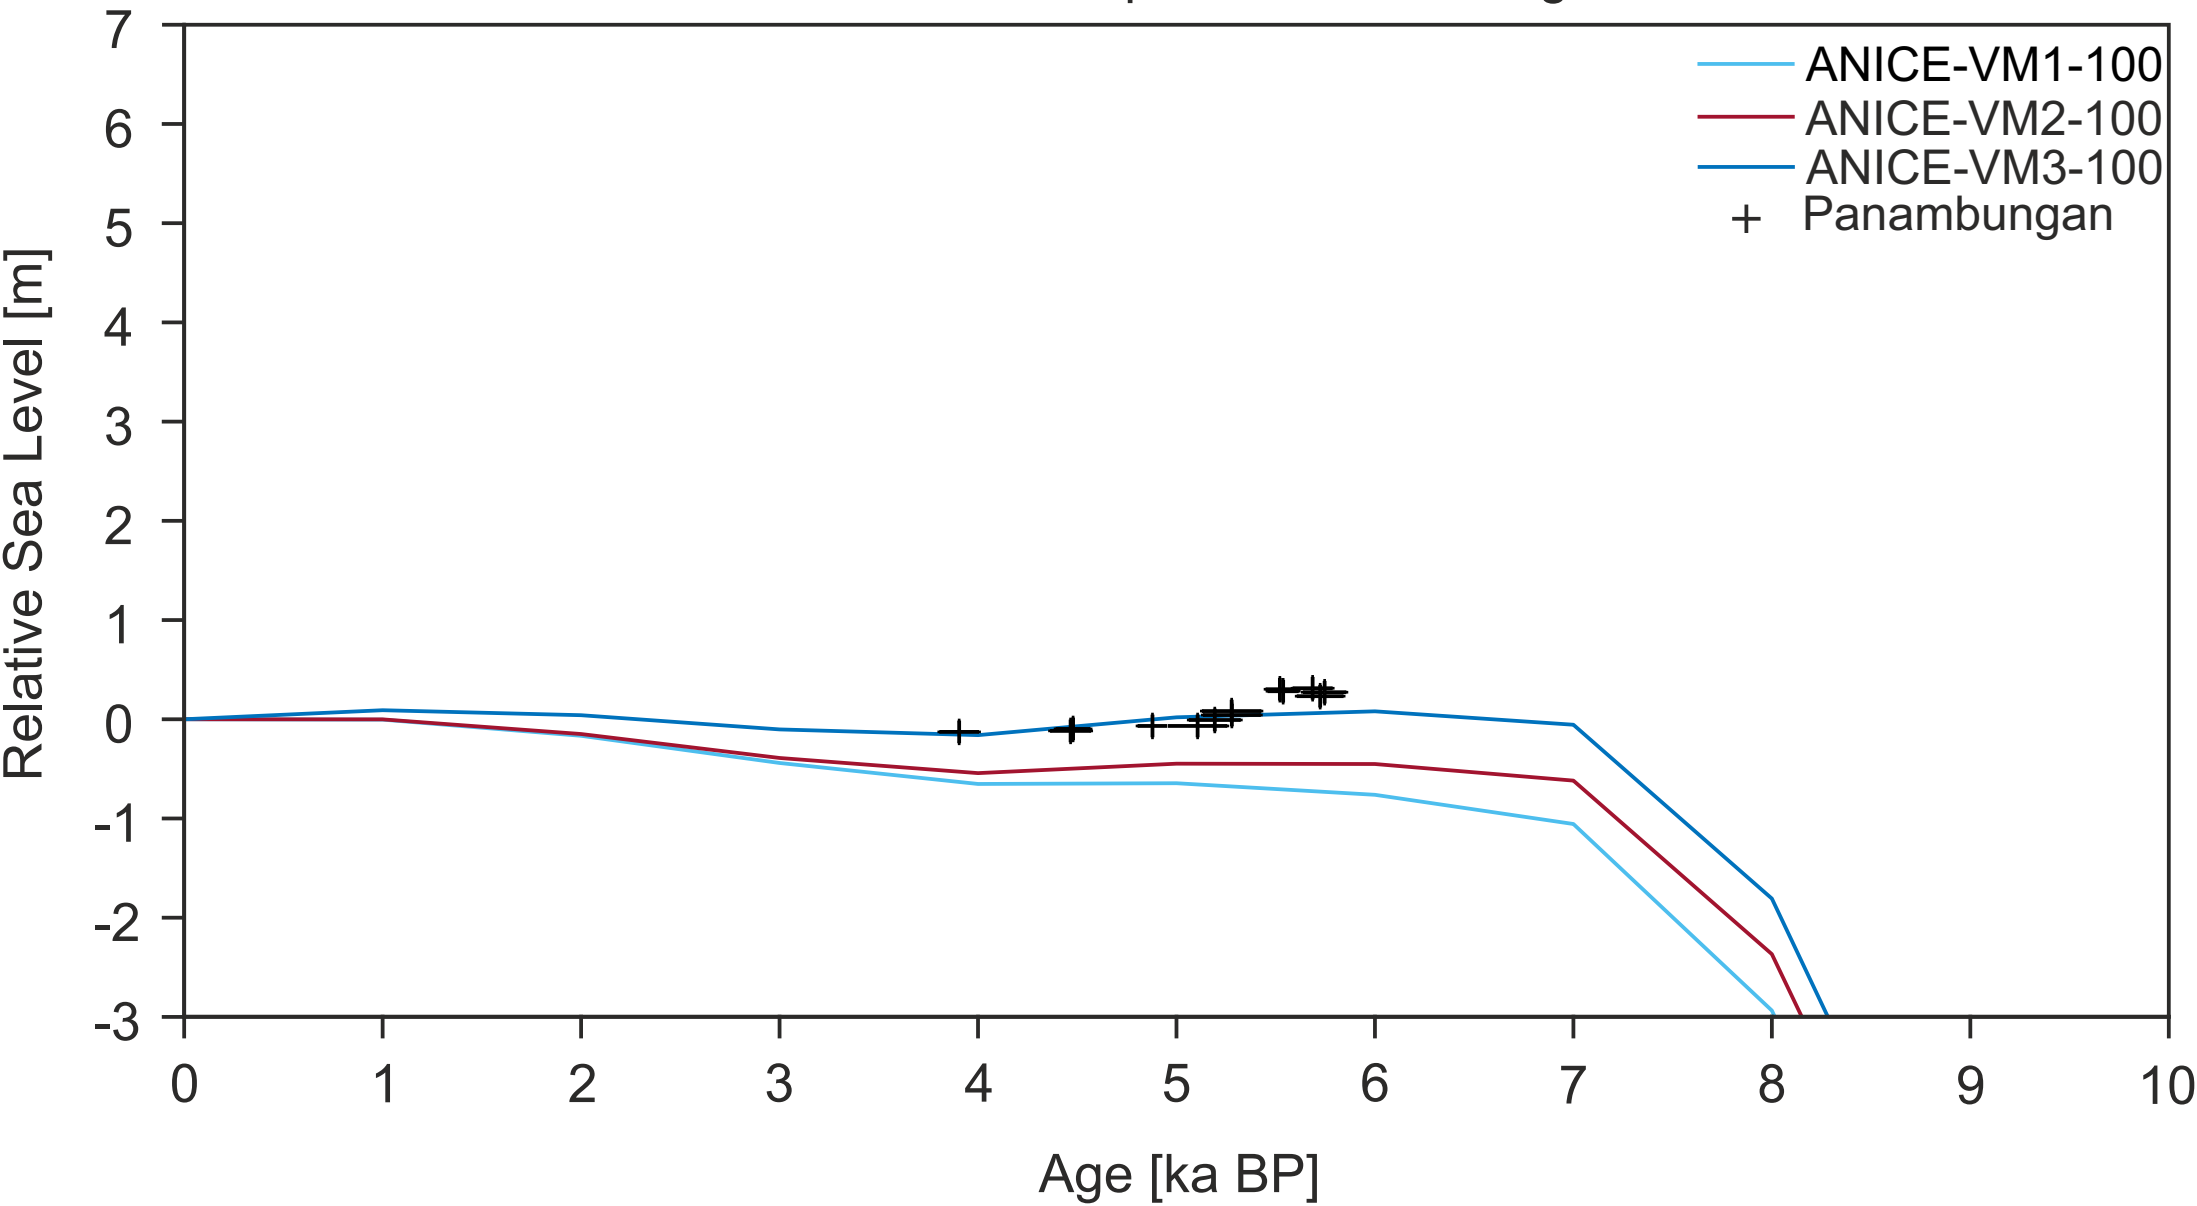

Sea Level Index points Sanrobengi

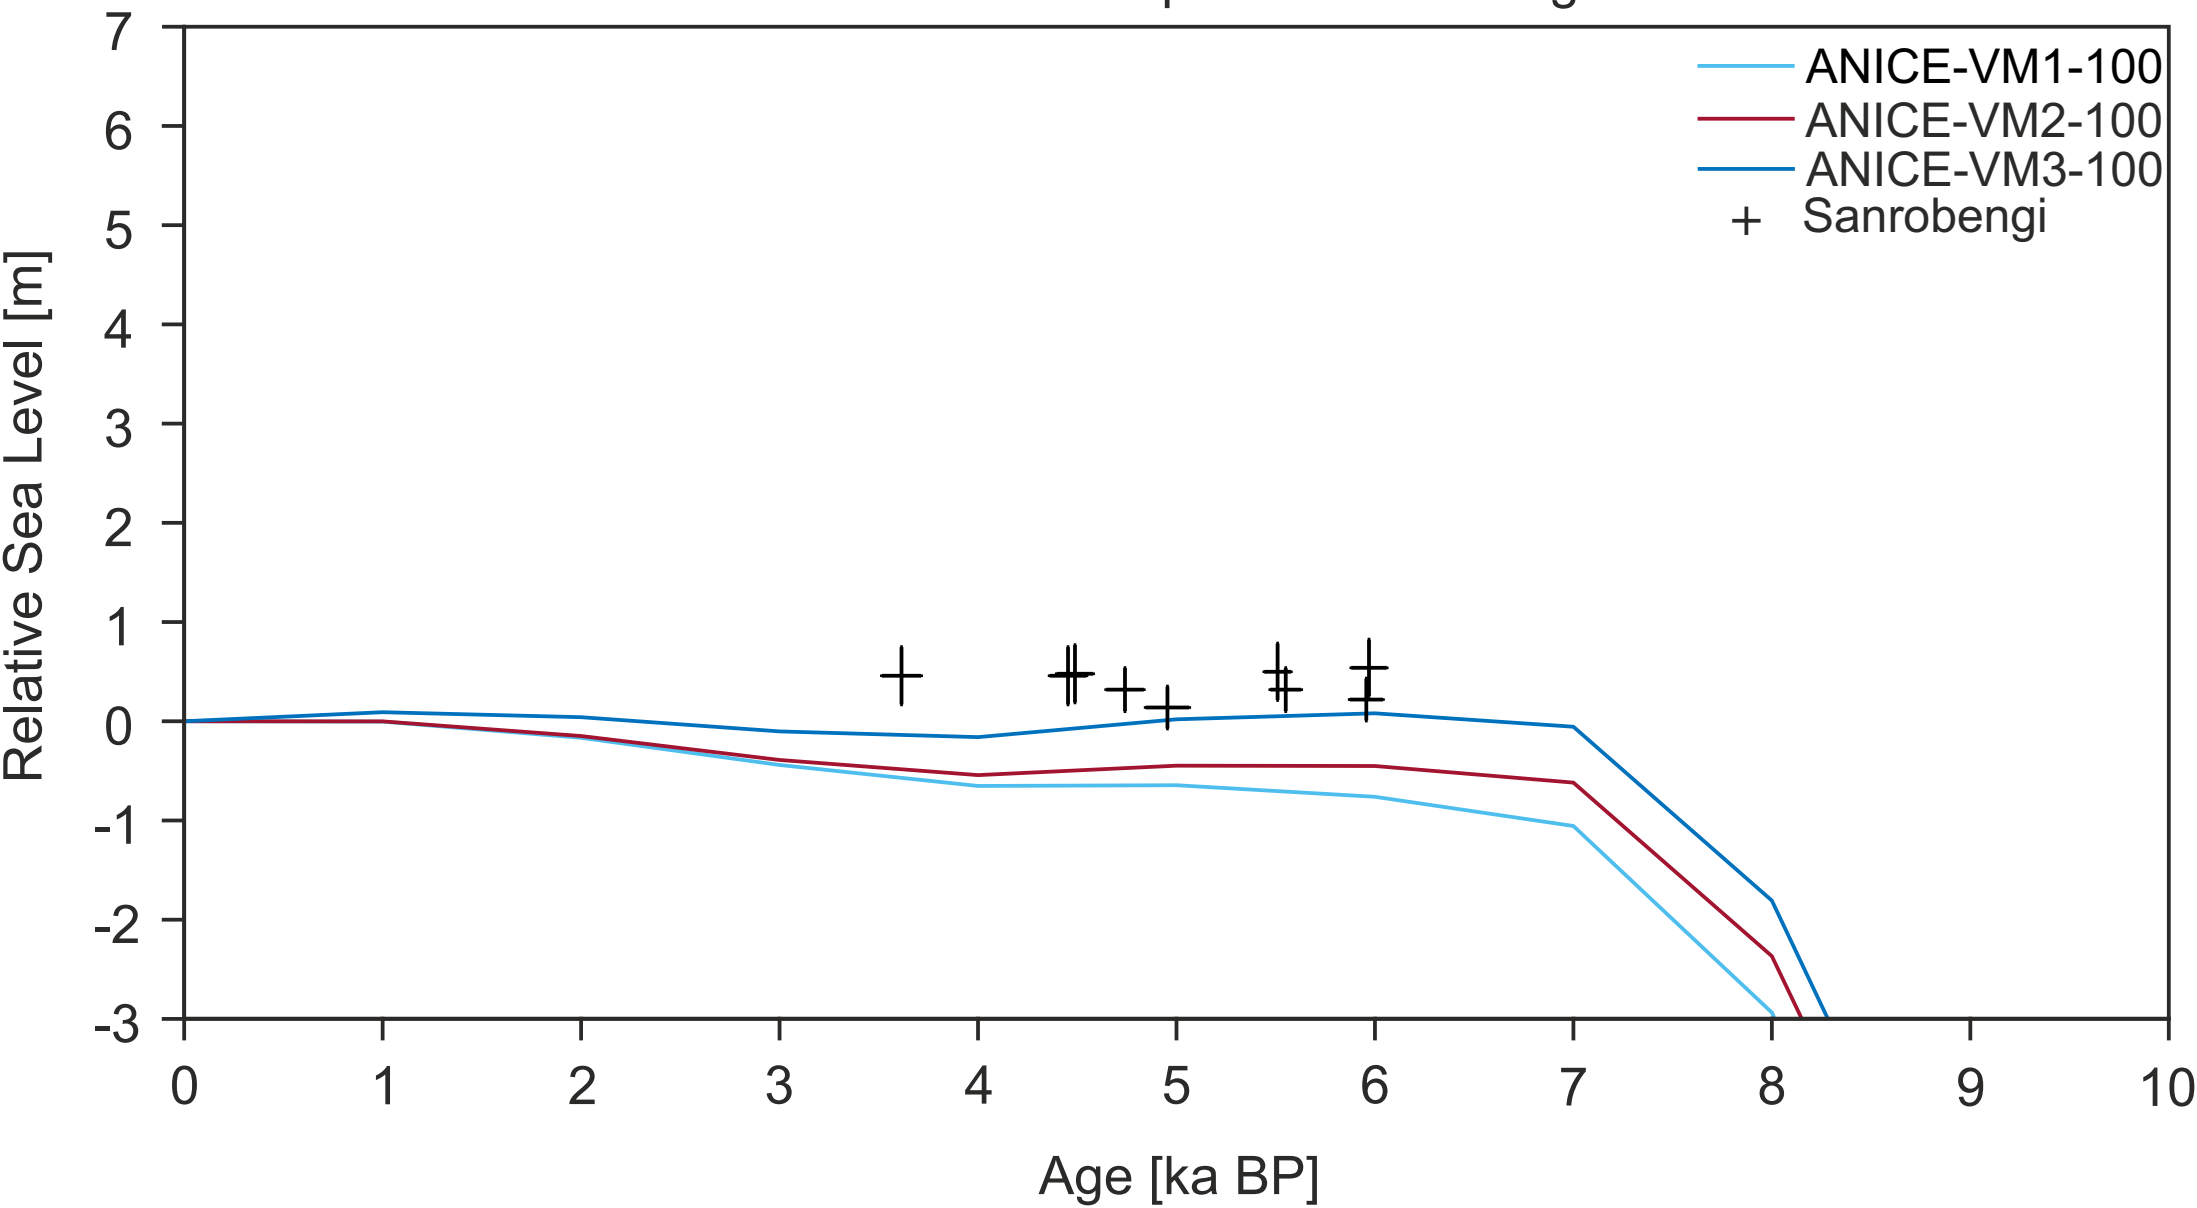

Sea Level Index points Suranti

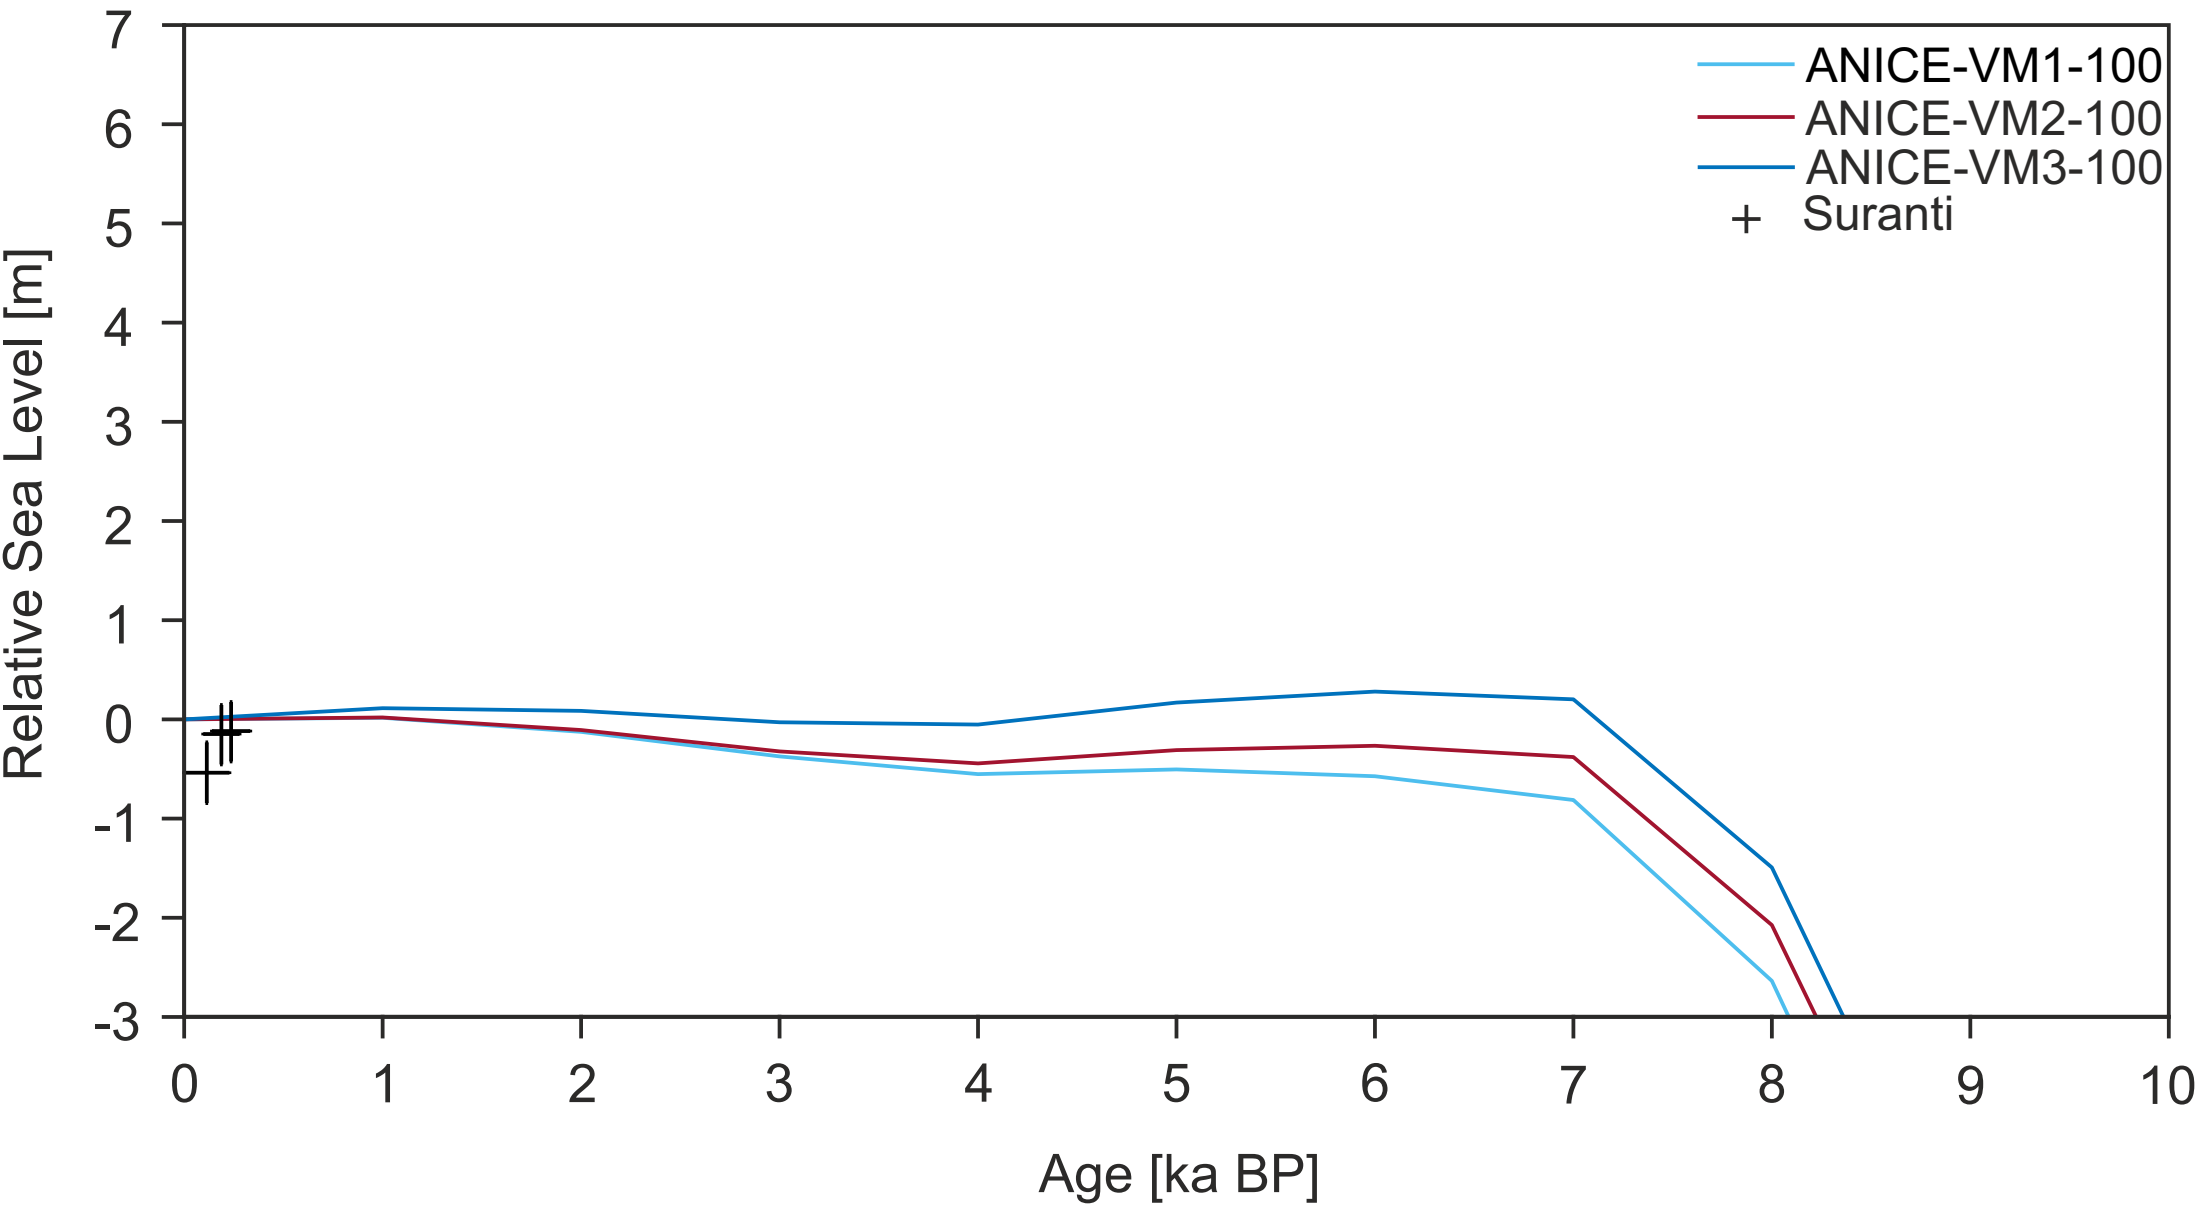

Sea Level Index points Tambakulu

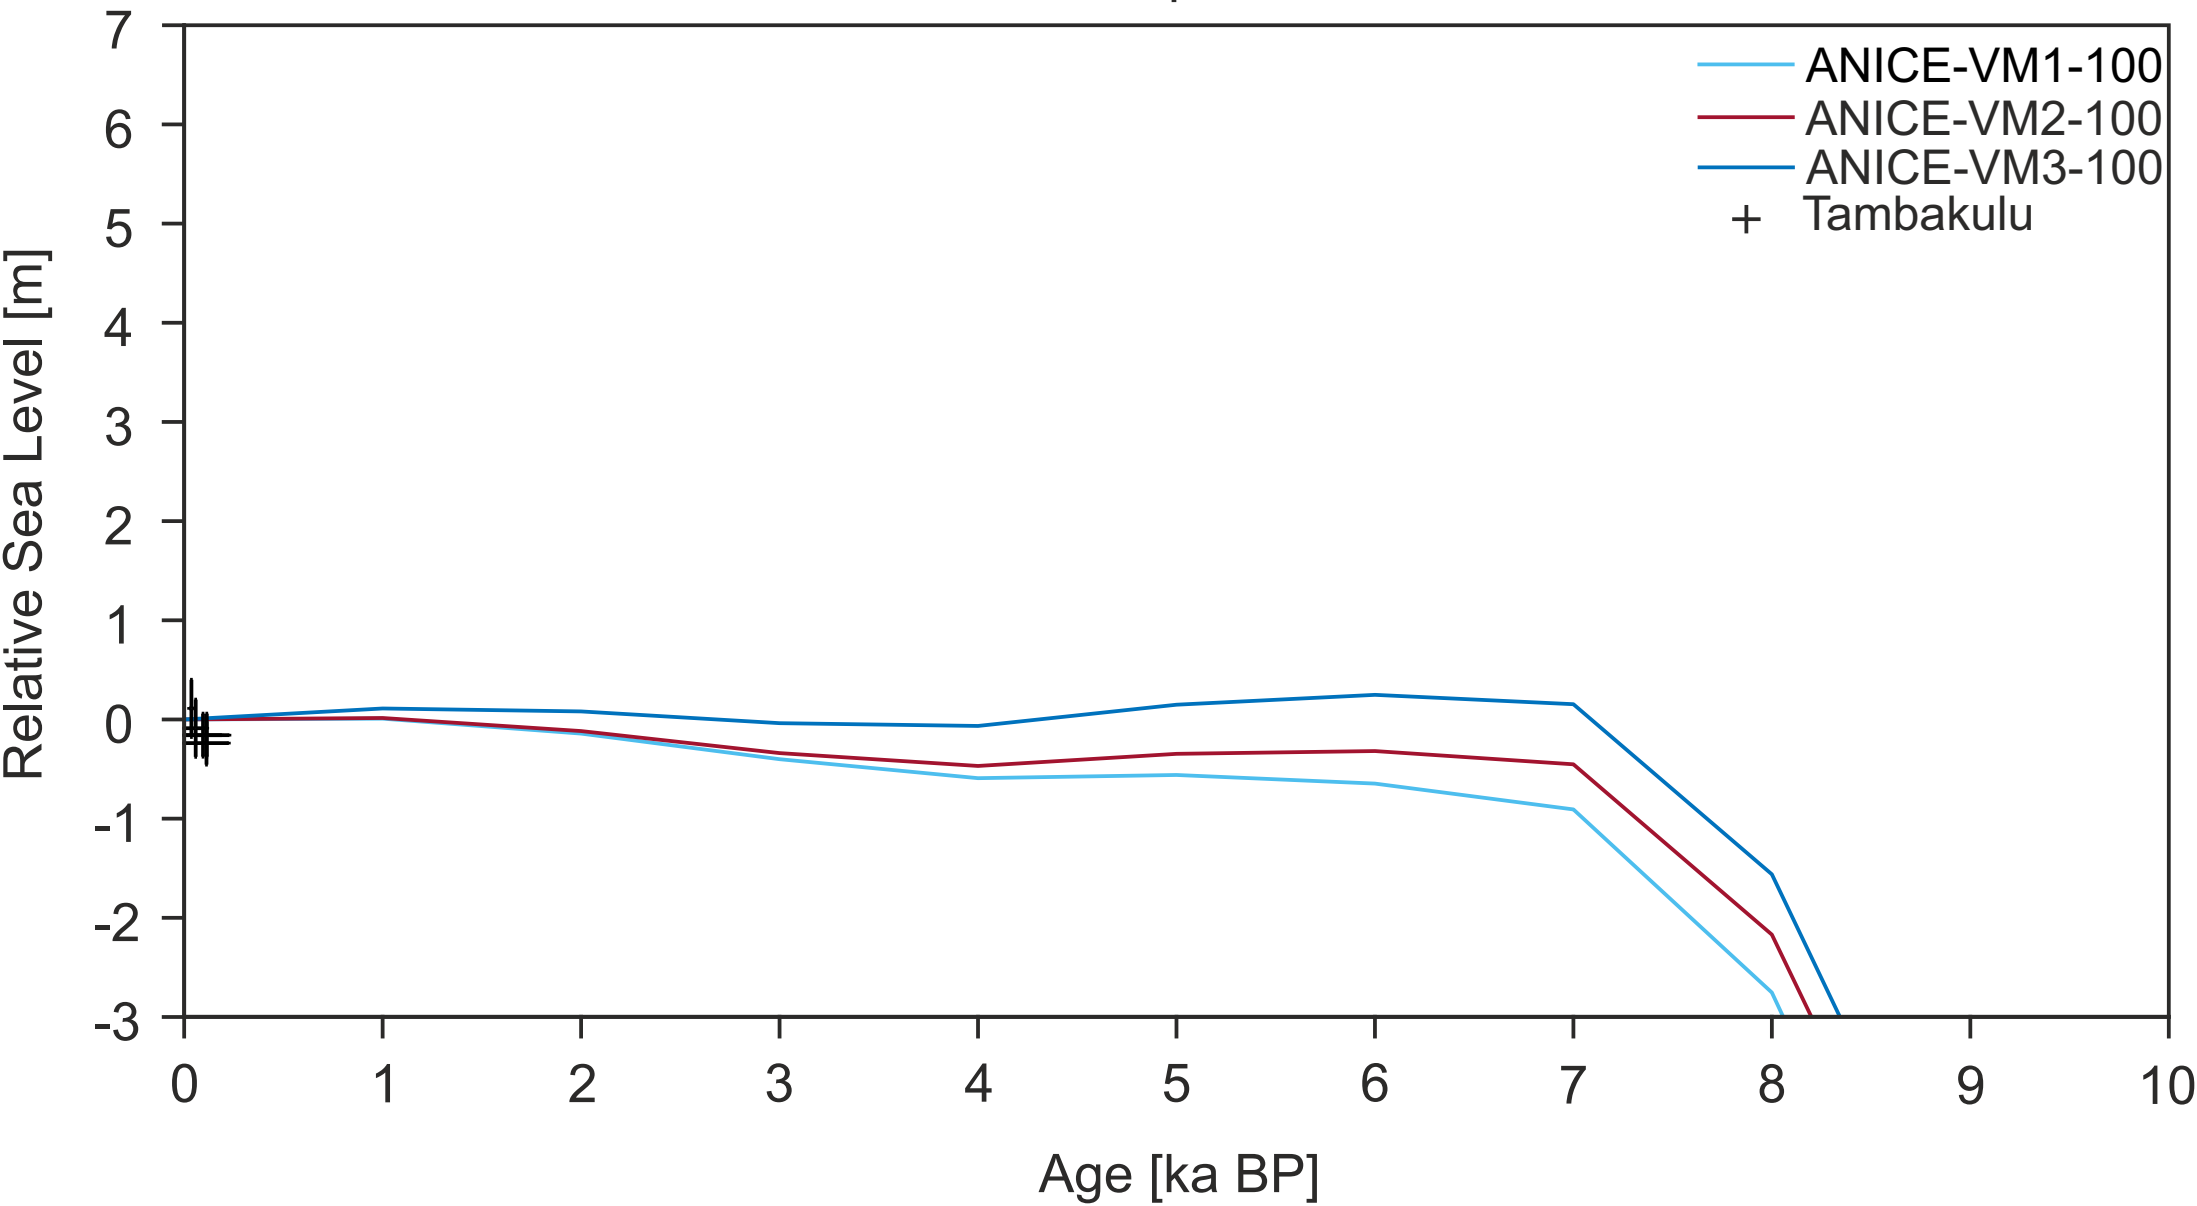

Supplement: Supplementary file 1 [file cp-2019-63-supplement.zip]
